# Supplementary material for: Using siloxane-based liquid electrolytes with high stability for fluoride shuttle batteries
Source: Royal Society of Chemistry journal article supplement (doi:10.1039/d0ta07551e), 2020-01-01
Supplement: d0ta07551e1.pdf [file d0ta07551e1.pdf]

## Using Siloxane-based Liquid Electrolytes with High Stability for Fluoride Shuttle Batteries

Asuman Celik Kucuk,<sup>\*a</sup> Toshiro Yamanaka<sup>a</sup> and Takeshi Abe<sup>b</sup>

*Office of Society-Academia Collaboration for Innovation, Kyoto University, Katsura, Nishikyo, Kyoto 615-8530, Japan.  
Graduate School of Global Environmental Studies, Kyoto University, Katsura, Nishikyo, Kyoto 615-8510, Japan.*

### Supporting information

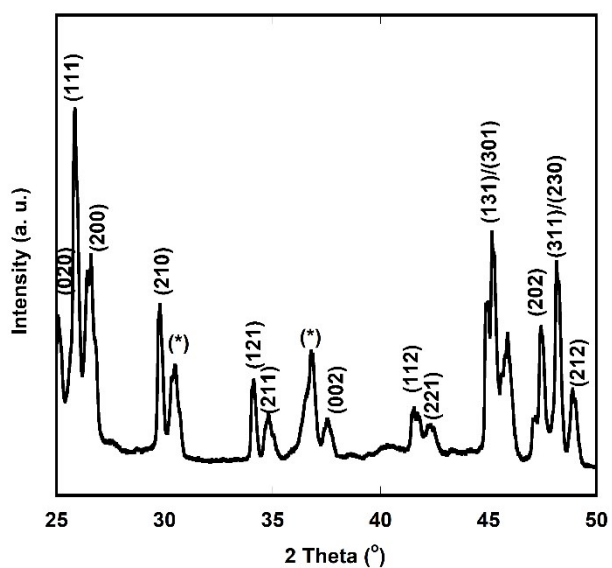

**Fig. S1** X-ray diffraction patterns of BiF<sub>3</sub>/C in the pristine state; \* represents the peak related to the pocket.

a)

b)

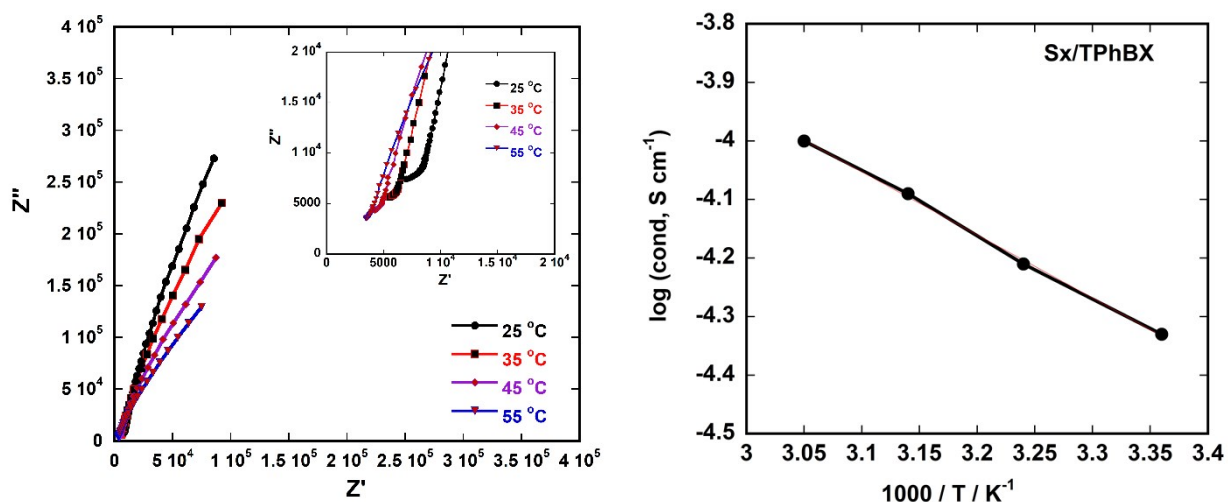

**Fig. S2** (a) Temperature dependence of the ionic conductivity for the Sx/TPhBX electrolyte solution (b) Temperature dependence of the conductivity of Sx/TPhBX prepared using Sx; 2,2,4,4-Tetramethyl-3,8,11,14,17-pentaoxa-2,4-disilaooctadecane and TPhBX; 2,4,6-triphenylboroxin, with saturated CsF.

**Table S1** Comparison between the temperature dependence of the conductivity of the Sx/TPhBX and Sx solutions (TPhBX; triphenyl boroxine, Sx; 2,2,4,4-tetramethyl-3,8,11,14,17-pentaoxa-2,4-disilaooctadecane, Ea; Activation Energy)

|          | 25 °C                 | 35 °C                 | 45 °C                 | 55 °C                 | Ea (kJ/mol) |
|----------|-----------------------|-----------------------|-----------------------|-----------------------|-------------|
| Sx/TPhBX | $4.62 \times 10^{-5}$ | $6.24 \times 10^{-5}$ | $8.06 \times 10^{-5}$ | $9.96 \times 10^{-5}$ | 20.61       |

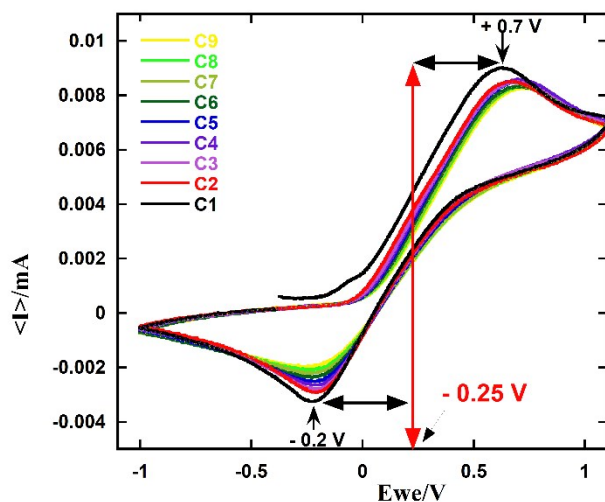

**Fig. S3** Determination of the redox potential of  $\text{Ag}^+/\text{Ag}$  in the Sx/TPhBX electrolyte against SHE by adding 0.004 M ferrocene to Sx/TPhBX. The anodic ( $E_{pa}$ ) and cathodic ( $E_{pc}$ ) peak potentials were obtained at a scan rate of  $5 \text{ mV s}^{-1}$ . The halfwave potential ( $E_{1/2}$ ) of the  $\text{Fe}(\text{C}_2\text{H}_5)_2^+/\text{Fe}(\text{C}_2\text{H}_5)_2$  ( $\text{Fc}^+/\text{Fc}$ ) couple in the Sx/TPhBX electrolyte was found to be 0.25 V.

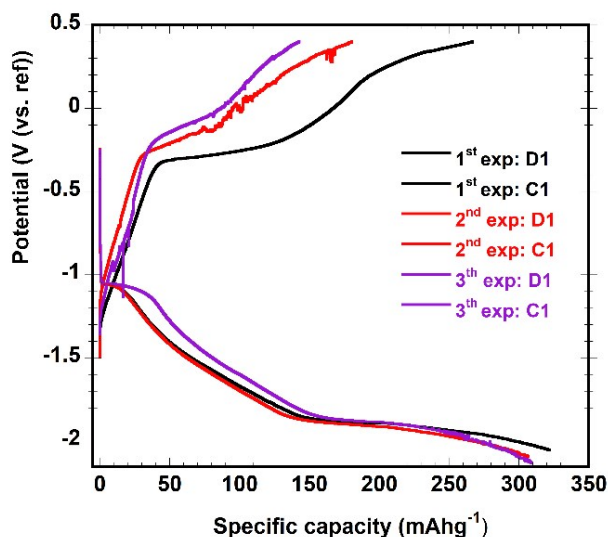

**Fig. S4** The potential profile of the  $\text{BiF}_3/\text{C}$  nanocomposite electrode in Sx/TPhBX was investigated three times (1<sup>st</sup> exp: 1<sup>st</sup> experiment, 2<sup>nd</sup> exp: 2<sup>nd</sup> experiment, 3<sup>th</sup> exp: 3<sup>th</sup> experiment).

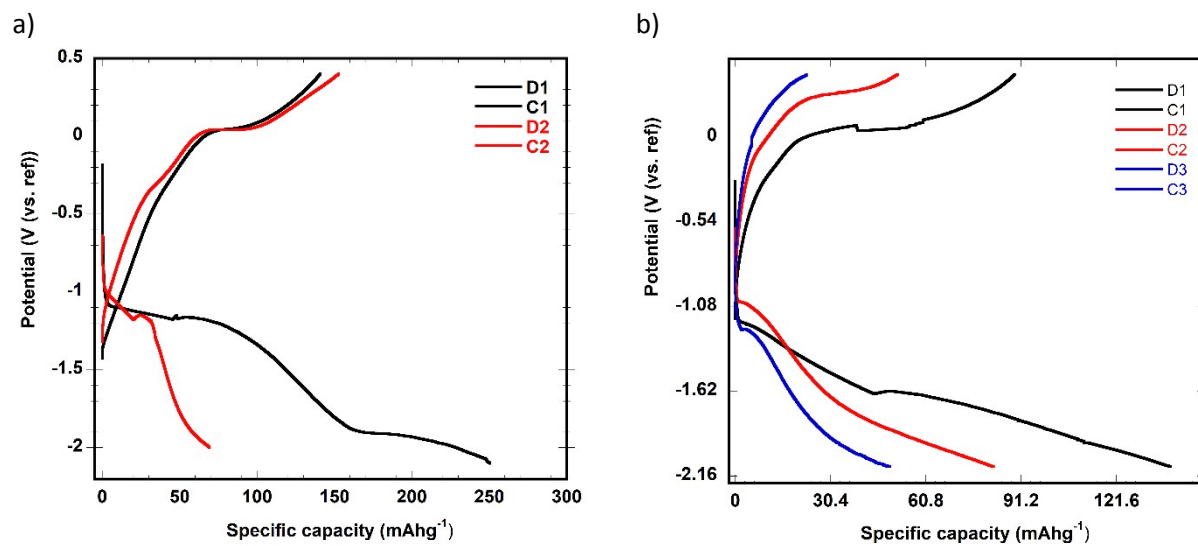

**Fig. S5** Initial two or three discharge-charge curves of BiF<sub>3</sub>/C nanocomposite electrodes cycled at room temperature and at (a) C/20, and (b) C/10 rates in Sx/TPhBX (discharging cutoff voltage: -2.05 V; charging cutoff voltage: 0.4 V).
